# Supplementary material for: Borophene and BC2N quantum dot heterostructures: ultrasensitive humidity sensing and multifunctional applications
Source: Royal Society of Chemistry journal article supplement (doi:10.1039/d3ta04473d), 2023-01-01
Supplement: d3ta04473d1.pdf [file d3ta04473d1.pdf]

Electronic Supplementary Material (ESI) for Journal of Materials Chemistry A.  
This journal is © The Royal Society of Chemistry 2023

## Supplementary Information

### **Borophene and BC<sub>2</sub>N quantum dots heterostructures: Ultrasensitive humidity sensing and multifunctional applications†**

Xiang Liu§, Chuang Hou§, Yi Liu, Shifan Chen, Zitong Wu, Xinchao Liang, and Guoan Tai\*

State Key Laboratory of Mechanics and Control for Aerospace Structures, Laboratory of Intelligent Nano Materials and Devices of Ministry of Education, College of Aerospace Engineering, Nanjing University of Aeronautics and Astronautics, Nanjing 210016, China

§ Xiang Liu and Chuang Hou contributed equally to this work.

\*E-mail: taiguoan@nuaa.edu.cn

**This file includes:**

**Fig. S1** TEM images of BC<sub>2</sub>N QDs.

**Fig. S2** TEM image of the borophene-BC<sub>2</sub>N heterostructures.

**Fig. S3** SEM-mapping of the borophene-BC<sub>2</sub>N heterostructures.

**Fig. S4** XRD pattern of the borophene-BC<sub>2</sub>N heterostructures.

**Fig. S5** Full-scale XPS survey of borophene, BC<sub>2</sub>N QDs and the borophene-BC<sub>2</sub>N heterostructures.

**Fig. S6** High resolution spectra of C 1s of BC<sub>2</sub>N QDs and borophene-BC<sub>2</sub>N heterostructures.

**Fig. S7** XPS characterization of BC<sub>2</sub>N QDs and borophene-BC<sub>2</sub>N heterostructures.

**Fig. S8** Schematic illustration of the transfer of photoinduced carriers.

**Fig. S9** Intrusion curves and pore size distribution of borophene-BC<sub>2</sub>N heterostructures.

**Fig. S10** Cyclic performance of the borophene-BC<sub>2</sub>N sensor at different relative humidity.

**Fig. S11** Response curves of the heterostructured sensor exposed to the typical organic vapors.

**Fig. S12** Response and recovery curves at 97% RH of the sensors based on different samples.

**Fig. S13** Analysis of energy band diagram.

**Fig. S14** The H<sub>2</sub>O adsorption process on the surface of the borophene-BC<sub>2</sub>N heterostructures.

**Fig. S15** Responses of the fabricated humidity sensors to the changes of wind, stress and temperature.

**Fig. S16** The response of the humidity sensor to humidity changes at different temperature.

**Fig. S17** Real-time current curve of the humidity sensor attached to diaper soaked with 600, 800 and 1000 mL.

**Fig. S18** Real-time current curve of the humidity sensor attached to diaper soaked with 500 mL of water at different cycles.

**Fig. S19** Schematic illustration of wireless monitoring system of respiratory behavior.

**Fig. S20** Repeated responses of the humidity sensor to different words.

**Fig. S21** Circuit diagram of the non-contact switch sensing system.

**Tab. S1** The conductivity of the borophene-BC<sub>2</sub>N heterostructures.

**Tab. S2** Comparison of reported resistive humidity sensors.

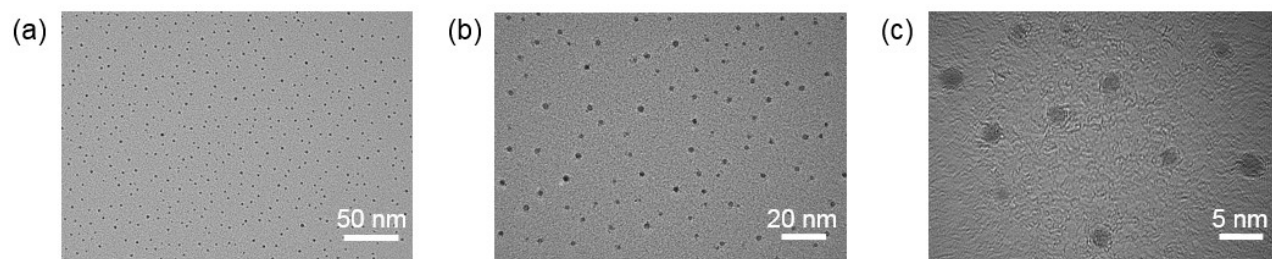

**Fig. S1** TEM images of BC<sub>2</sub>N QDs.

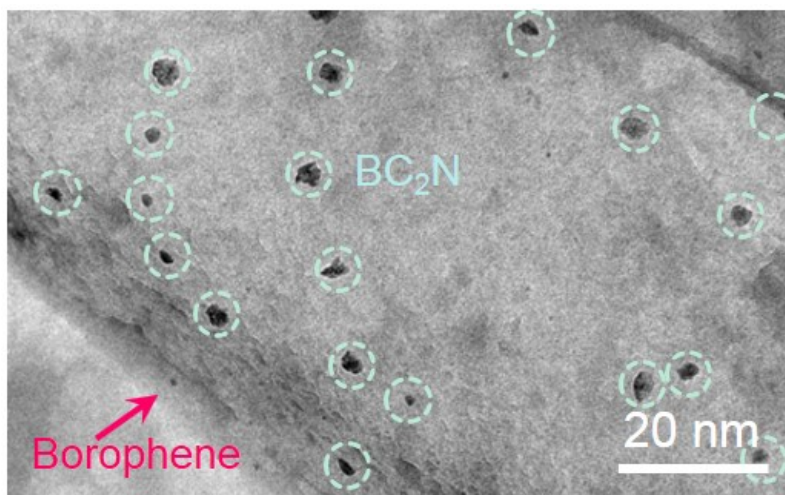

**Fig. S2** TEM image of the borophene-BC<sub>2</sub>N heterostructures.

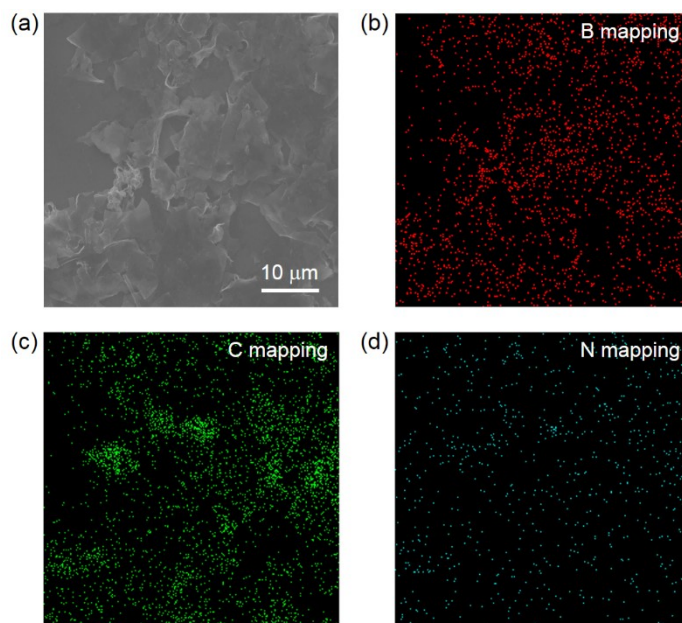

**Fig. S3** SEM-mapping of the borophene-BC<sub>2</sub>N heterostructures. (a) SEM image of the heterostructures. (b-d) B, C and N elemental mappings of the heterostructures.

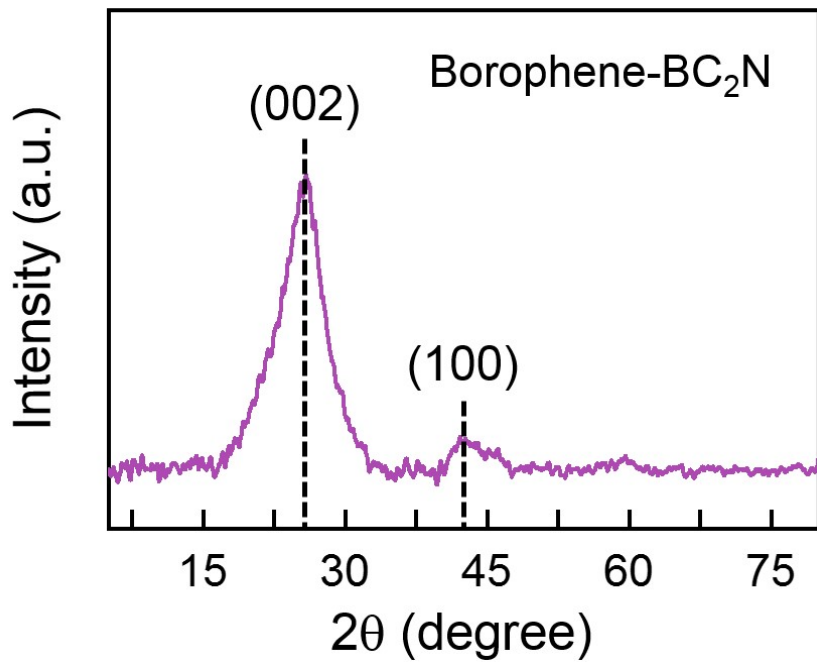

Fig. S4 XRD pattern of the borophene-BC<sub>2</sub>N heterostructures.

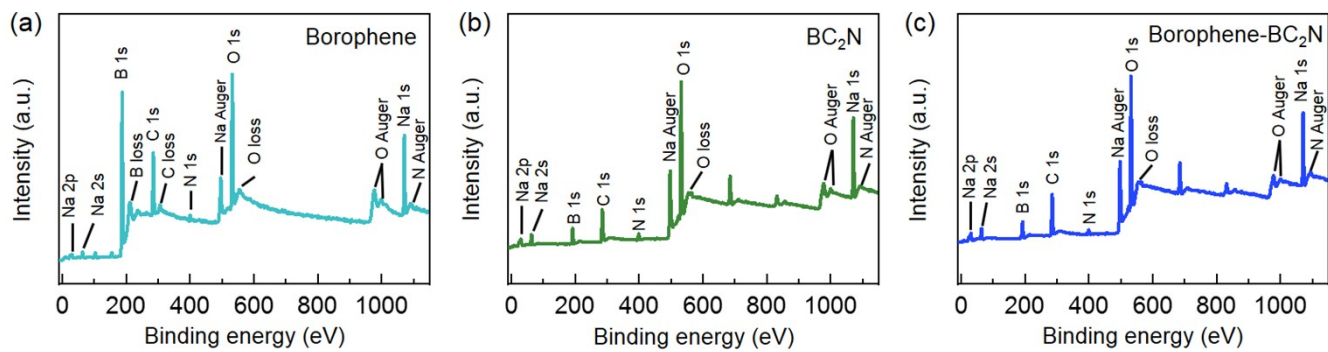

**Fig. S5** Full-scale XPS survey of (a) borophene, (b) BC<sub>2</sub>N QDs and (c) borophene-BC<sub>2</sub>N heterostructures.

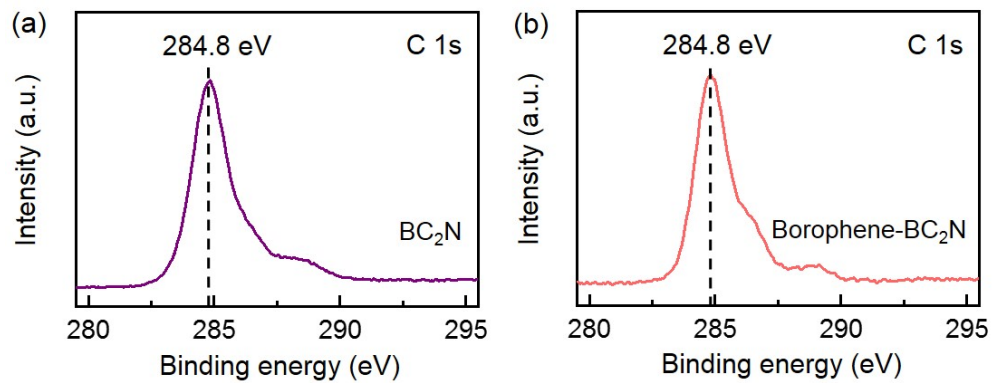

**Fig. S6** High resolution spectra of C 1s of (a) BC<sub>2</sub>N QDs and (b) borophene-BC<sub>2</sub>N heterostructures.



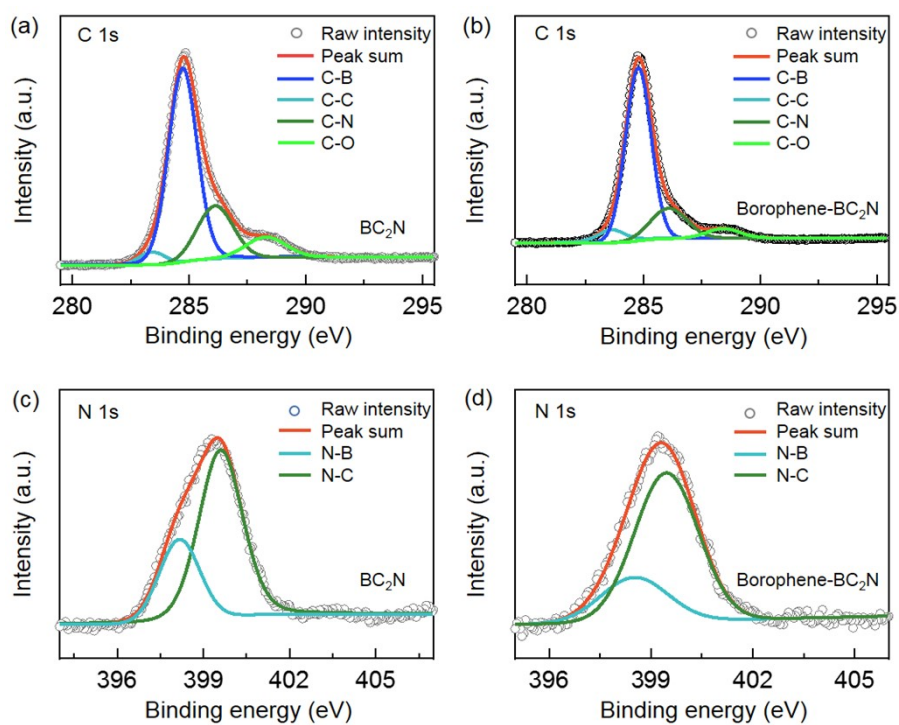

**Fig. S7** XPS characterization of BC<sub>2</sub>N QDs and borophene-BC<sub>2</sub>N heterostructures. (a, b) High-resolution C 1s spectrum of (a) BC<sub>2</sub>N QDs and (b) borophene-BC<sub>2</sub>N heterostructures. (c, d) High-resolution N 1s spectrum of (c) BC<sub>2</sub>N QDs and (d) borophene-BC<sub>2</sub>N heterostructures.

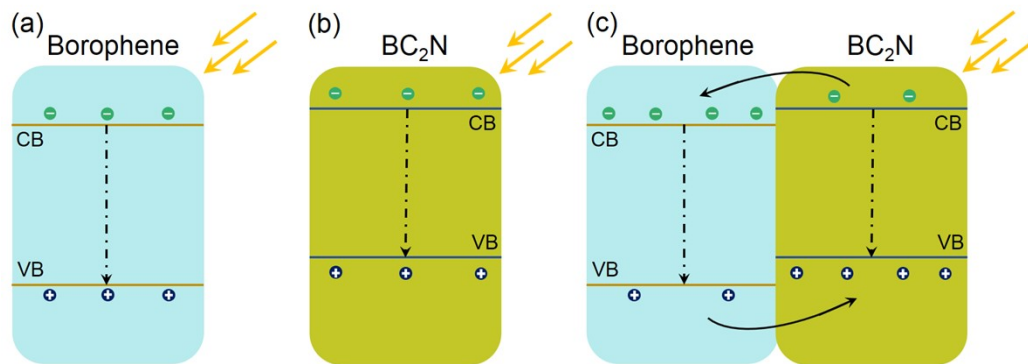

**Fig. S8** Schematic illustration of the transfer of photoinduced carriers for (a) borophene, (b) BC<sub>2</sub>N QDs and (c) borophene-BC<sub>2</sub>N heterostructures.

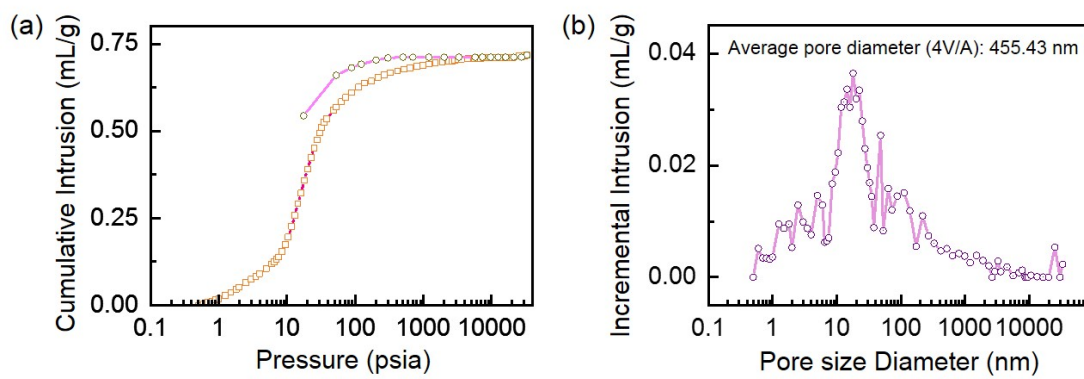

**Fig. S9** Intrusion curves and pore size distribution of the borophene-BC<sub>2</sub>N heterostructures. (a) Mercury adsorption-desorption isotherm. (b) Pore size distribution curve.

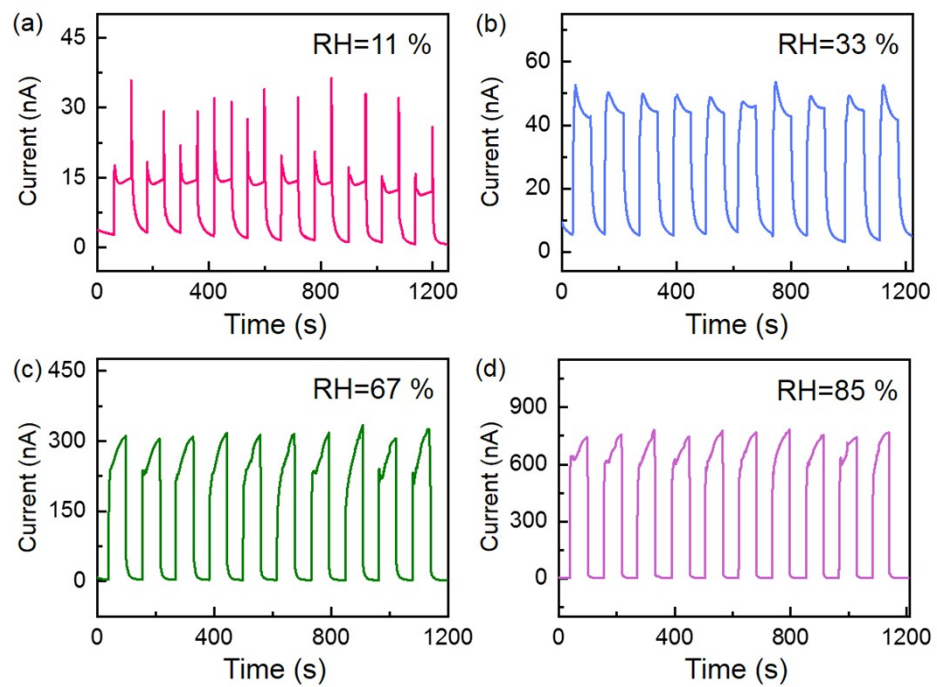

**Fig. S10** Cyclic performance of the borophene-BC<sub>2</sub>N sensor at (a) 11% RH, (b) 33% RH, (c) 67% RH and (d) 85% RH, respectively.

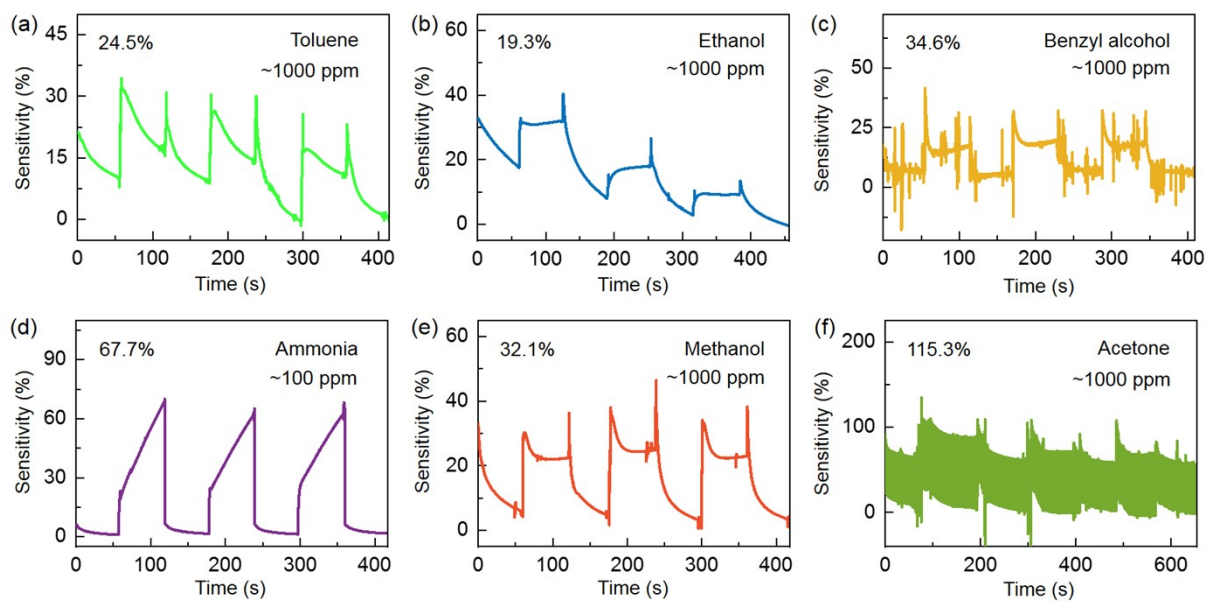

**Fig. S11** Response curves of the heterostructured sensor exposed to the typical organic vapors: (a) toluene, (b) ethanol, (c) benzyl alcohol, (d) ammonia, (e) methanol, and (f) acetone.

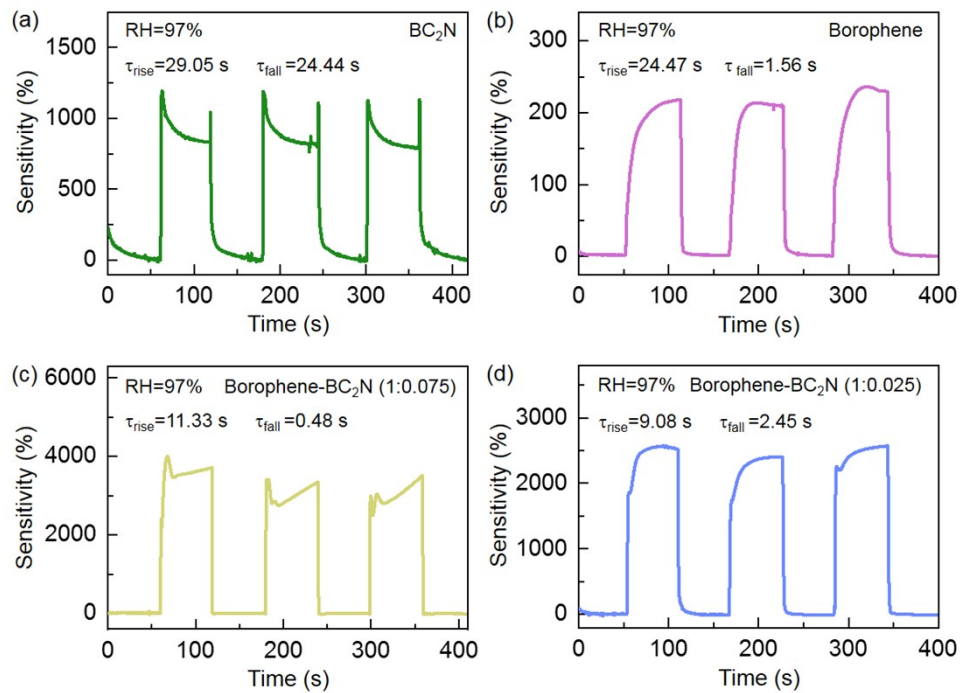

**Fig. S12** Response and recovery curves at 97% RH of the sensors based on different samples: (a) BC<sub>2</sub>N QDs, (b) borophene, (c) borophene-BC<sub>2</sub>N (1:0.075) and (d) borophene-BC<sub>2</sub>N (1:0.025).

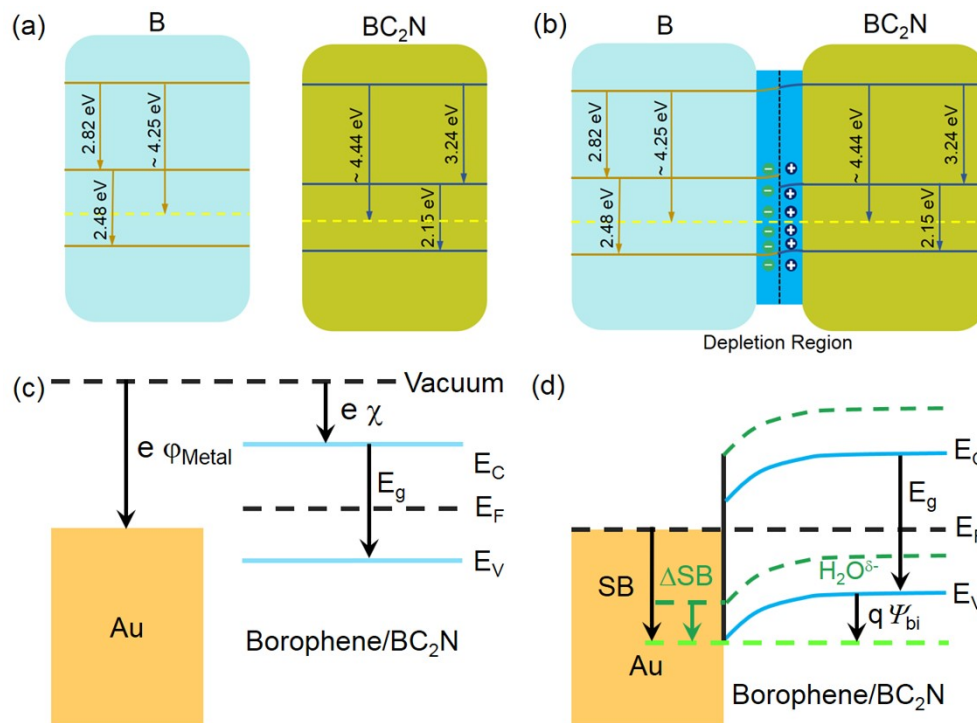

**Fig. S13** Analysis of energy band diagram. (a) Band diagram of the borophene and  $\text{BC}_2\text{N}$  before contact. (b) Band realignment of the borophene and  $\text{BC}_2\text{N}$  after contact and the formation of Schottky barrier. (c) Band diagram of the borophene/ $\text{BC}_2\text{N}$  and Au electrode before contact. (d) Band realignment of the borophene/ $\text{BC}_2\text{N}$  and Au electrode after contact and the formation of Schottky barrier, blue and green lines indicate the energy band of the pristine borophene (solid blue), and after exposure to  $\text{H}_2\text{O}$  (dashed green), respectively.

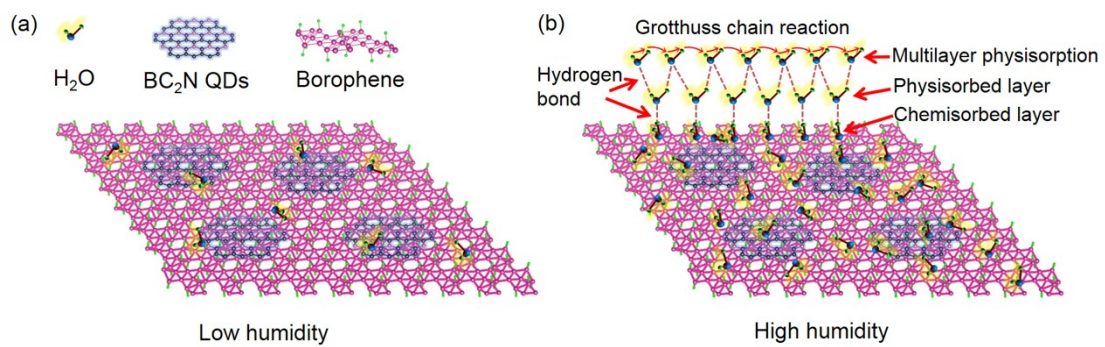

**Fig. S14** The  $H_2O$  adsorption process on the surface of the borophene-BC<sub>2</sub>N heterostructures.



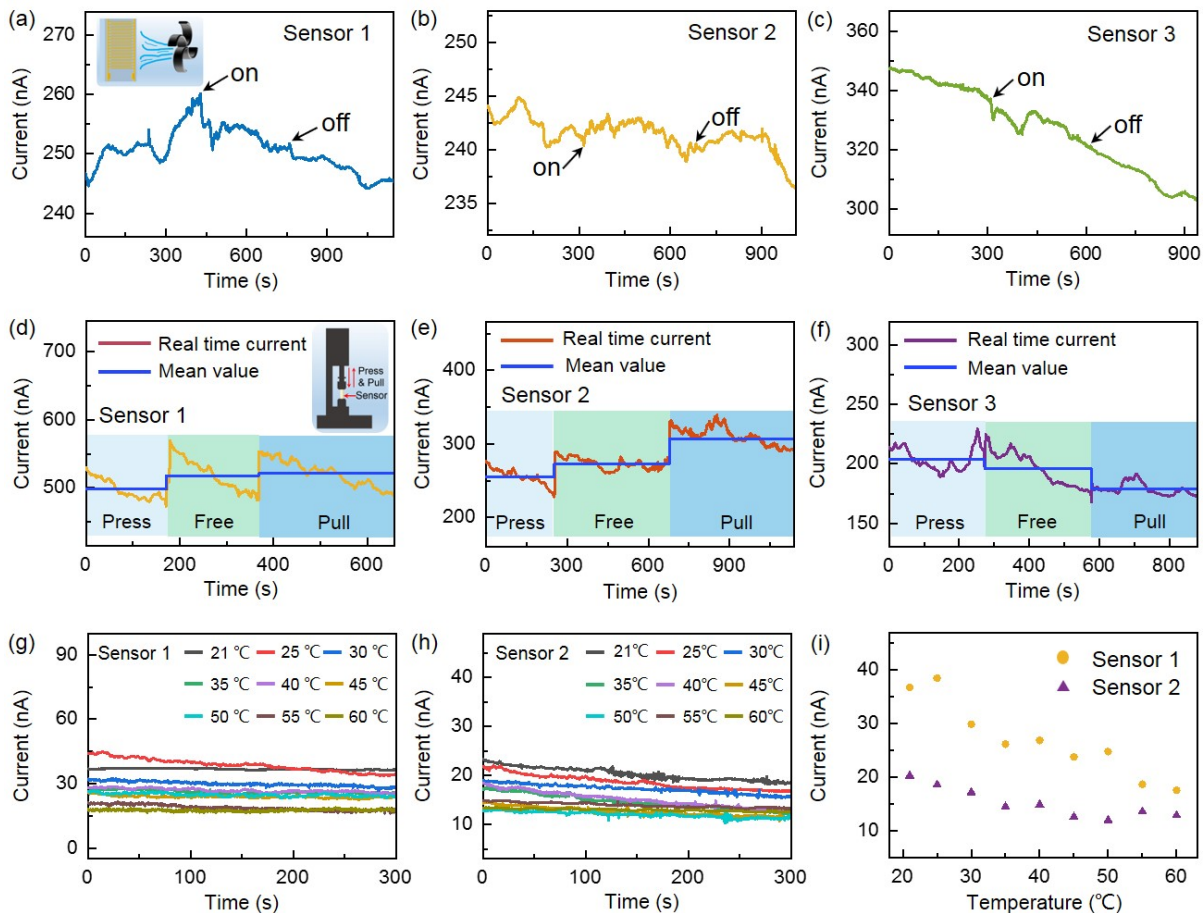

**Fig. S15** Responses of the fabricated humidity sensors to the changes of (a-c) wind, (d-f) stress and (g-h) temperature. (i) Relationship between the temperature and the current of the sensors.

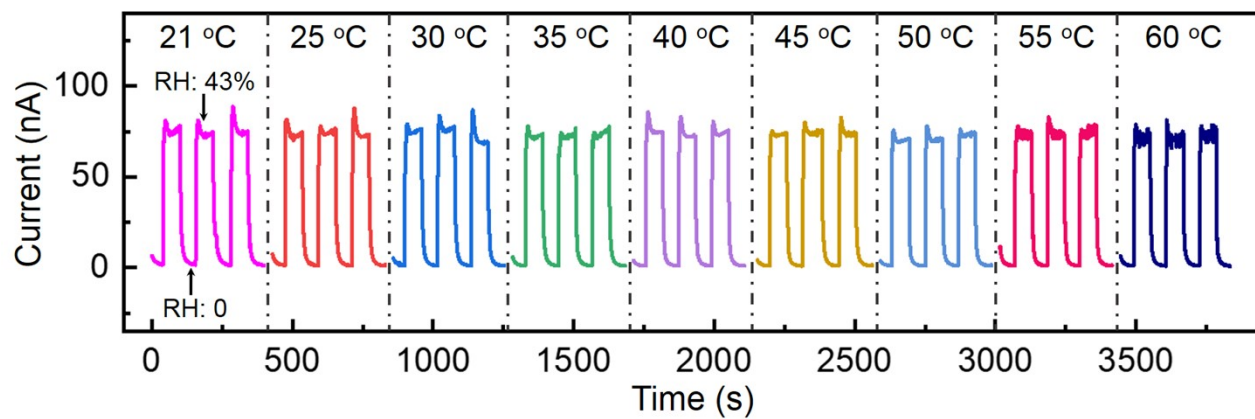

**Fig. S16** The response of the humidity sensor to humidity changes (RH: 0%-43%) at different temperature.

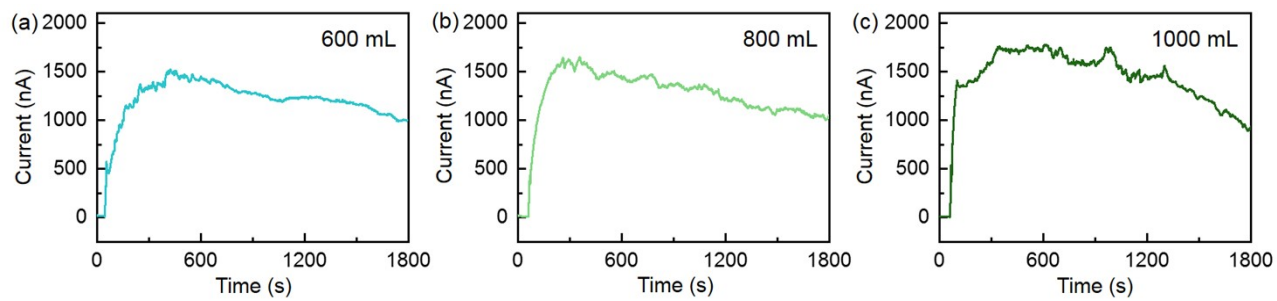

**Fig. S17** Real-time current curve of the humidity sensor attached to diaper soaked with 600, 800 and 1000 mL.

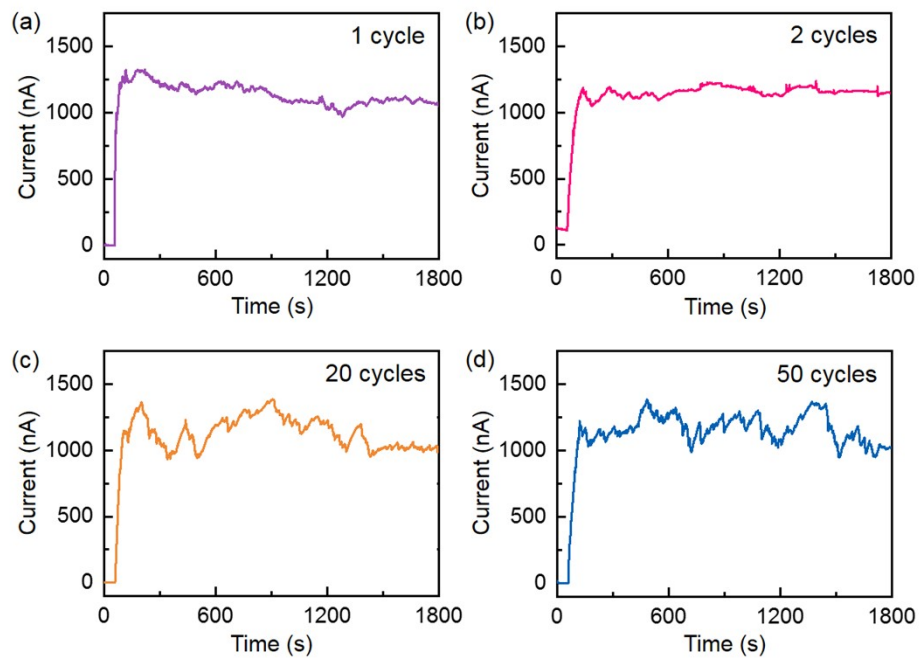

**Fig. S18** Real-time current curve of the humidity sensor attached to diaper soaked with 500 mL of water at different cycles.

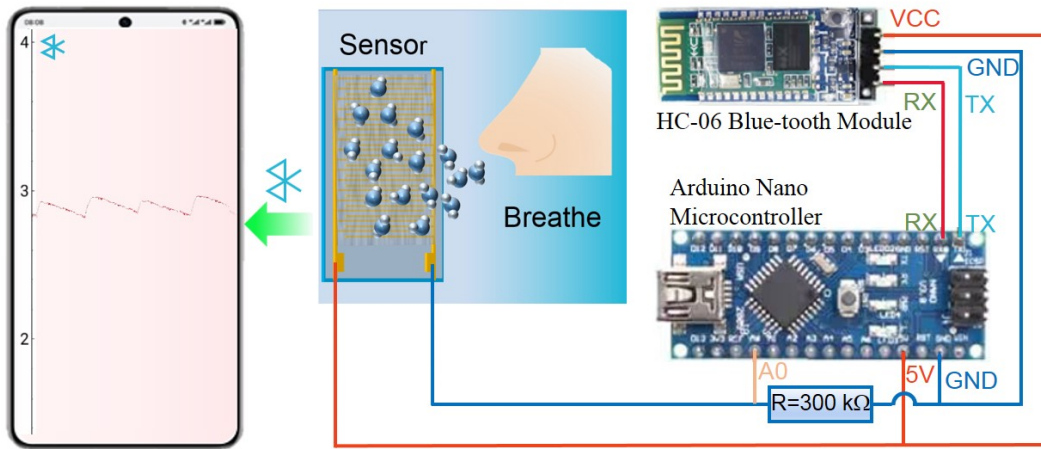

**Fig. S19** Schematic illustration of wireless monitoring system of respiratory behavior.

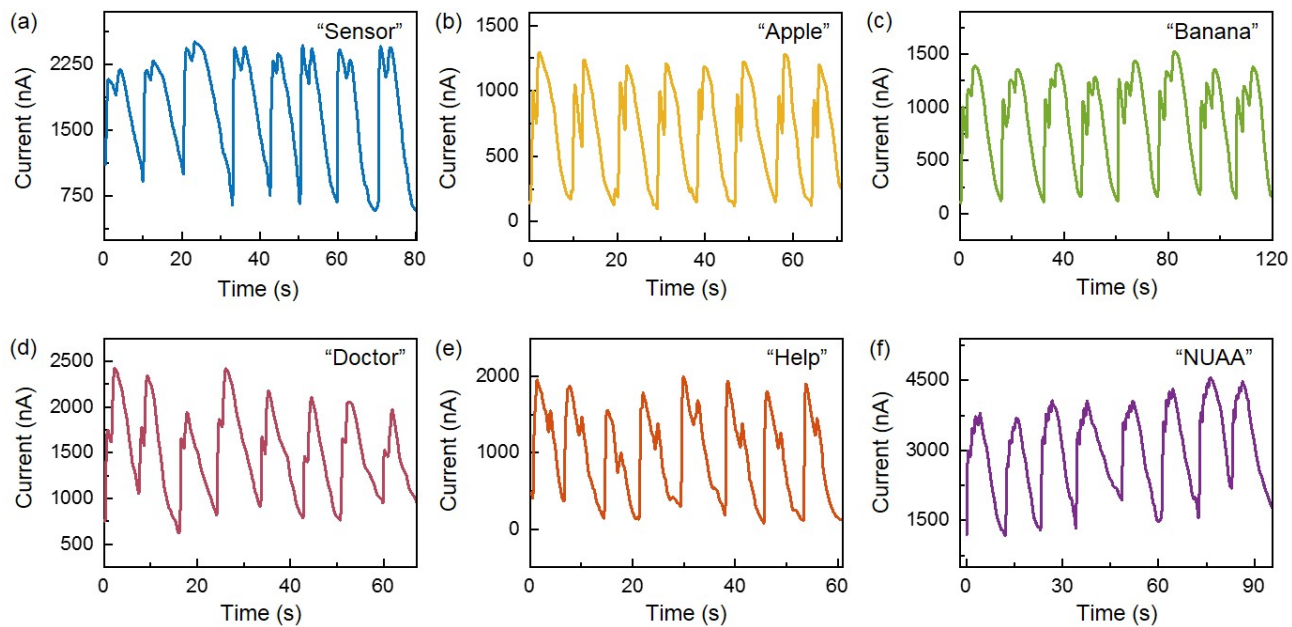

**Fig. S20** Repeated responses of the humidity sensor to words: (a) "Sensor", (b) "Apple", (c) "Banana", (d) "Doctor", (e) "Help" and (g) "NUAA".

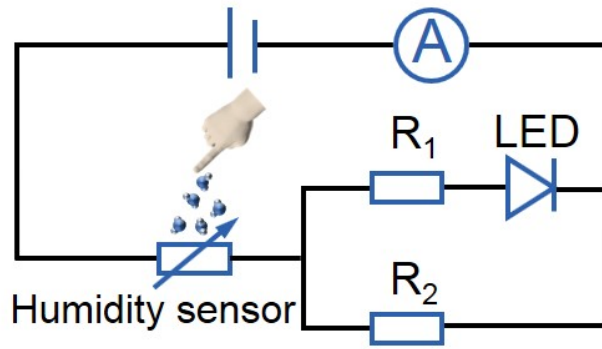

**Fig. S21** Circuit diagram of the non-contact switch sensing system.

**Tab. S1** The conductivity of the borophene-BC<sub>2</sub>N heterostructures.

|          | Test 1 | Test 2 | Test 3 | Test 4 | Test 5 | Test 6 | Test 7 | Test 8 | Test 9 | Test 10 | Average |       |
|----------|--------|--------|--------|--------|--------|--------|--------|--------|--------|---------|---------|-------|
| Sample 1 | 329    | 381    | 361    | 378    | 368    | 394    | 396    | 394    | 382    | 390     | 377.3   |       |
| Sample 2 | 411    | 397    | 375    | 386    | 402    | 366    | 387    | 368    | 425    | 399     | 391.6   | 375.4 |
| Sample 3 | 319    | 350    | 381    | 326    | 336    | 334    | 395    | 384    | 361    | 388     | 357.4   |       |

Notes: the unit of conductivity is  $\mu\text{s/cm}$



**Tab. S2** Comparison of reported resistive humidity sensors.

| Material                         | Measured RH Value | Sensitivity (%) | Response (s) / Recovery (s) | RH range (%) | Reference        |
|----------------------------------|-------------------|-----------------|-----------------------------|--------------|------------------|
| Graphene                         | 96                | 0.3             | 0.6/0.4                     | 1-96         | 1                |
| rGO                              | 100               | 20.4            | 180-300/ Irreversible       | 10-100       | 2                |
| MoS <sub>2</sub>                 | 89.5              | 2327            | 140/80                      | 17.2-89.5    | 3                |
| $\alpha'$ -4H-Borophene          | 85                | 150             | 2.3/0.7                     | 67-85        | 4                |
| Black phosphorus (BP)            | 97                | 521             | 101/26                      | 11-97        | 5                |
| rGO-PVP                          | 90                | 52              | 10/20                       | 20-90        | 6                |
| rGO-MoS <sub>2</sub>             | 50                | 23.9            | 30/253                      | 10-90        | 7                |
| rGO-SnO <sub>2</sub>             | 95                | 4600            | 10/60                       | 11-95        | 8                |
| Borophene-graphene               | 85                | 4200            | 10.5/8.3                    | 0-85         | 4                |
| GO-C <sub>60</sub>               | 97.3              | 1060            | 8/7                         | 11.3-97.3    | 9                |
| <b>Borophene-BC<sub>2</sub>N</b> | <b>97</b>         | <b>22001</b>    | <b>11.82/1.41</b>           | <b>11-97</b> | <b>This work</b> |

## References

- 1 A. D. Smith, K. Elgammal, F. Niklaus, A. Delin, A. C. Fischer, S. Vaziri, F. Forsberg, M. Rasander, H. Hugosson, L. Bergqvist, S. Schroder, S. Kataria, M. Ostling and M. C. Lemme, *Nanoscale*, 2015, **7**, 19099-19109.
- 2 D. Zhang, J. Tong and B. Xia, *Sensors and Actuators B: Chemical*, 2014, **197**, 66-72.
- 3 Y. Tan, K. Yu, T. Yang, Q. Zhang, W. Cong, H. Yin, Z. Zhang, Y. Chen and Z. Zhu, *J. Mater. Chem. C*, 2014, **2**, 5422.
- 4 C. Hou, G. A. Tai, B. Liu, Z. Wu and Y. Yin, *Nano Res.*, 2021, **14**, 2337-2344.
- 5 B. Li, Q. Tian, H. Su, X. Wang, T. Wang and D. Zhang, *Sensors and Actuators B: Chemical*, 2019, **299**, 126973.
- 6 B. Bhangare, S. Jagtap, N. Ramgir, R. Waichal, K. P. Muthe, S. K. Gupta, S. C. Gadkari, D. K. Aswal and S. Gosavi, *IEEE Sens. J.*, 2018, **18**, 9097-9104.
- 7 S. Y. Park, J. E. Lee, Y. H. Kim, J. J. Kim, Y. Shim, S. Y. Kim, M. H. Lee and H. W. Jang, *Sensors and Actuators B: Chemical*, 2018, **258**, 775-782.
- 8 M. B. Erande, M. S. Pawar and D. J. Late, *ACS Appl. Mater. Interfaces*, 2016, **8**, 11548-11556.
- 9 V. Shukla, J. Wärnå, N. K. Jena, A. Grigoriev and R. Ahuja, *J. Phys. Chem. C*, 2017, **121**, 26869-26876.
